# Supplementary material for: Genomic Variability among Field Isolates and Laboratory-Adapted Strains ofLeptospira borgpeterseniiSerovar Hardjo
Source: Hindawi journal article supplement (doi:10.1155/2018/2137036), 2018-01-01
Supplement: f1 [file 2137036.f1.pdf]

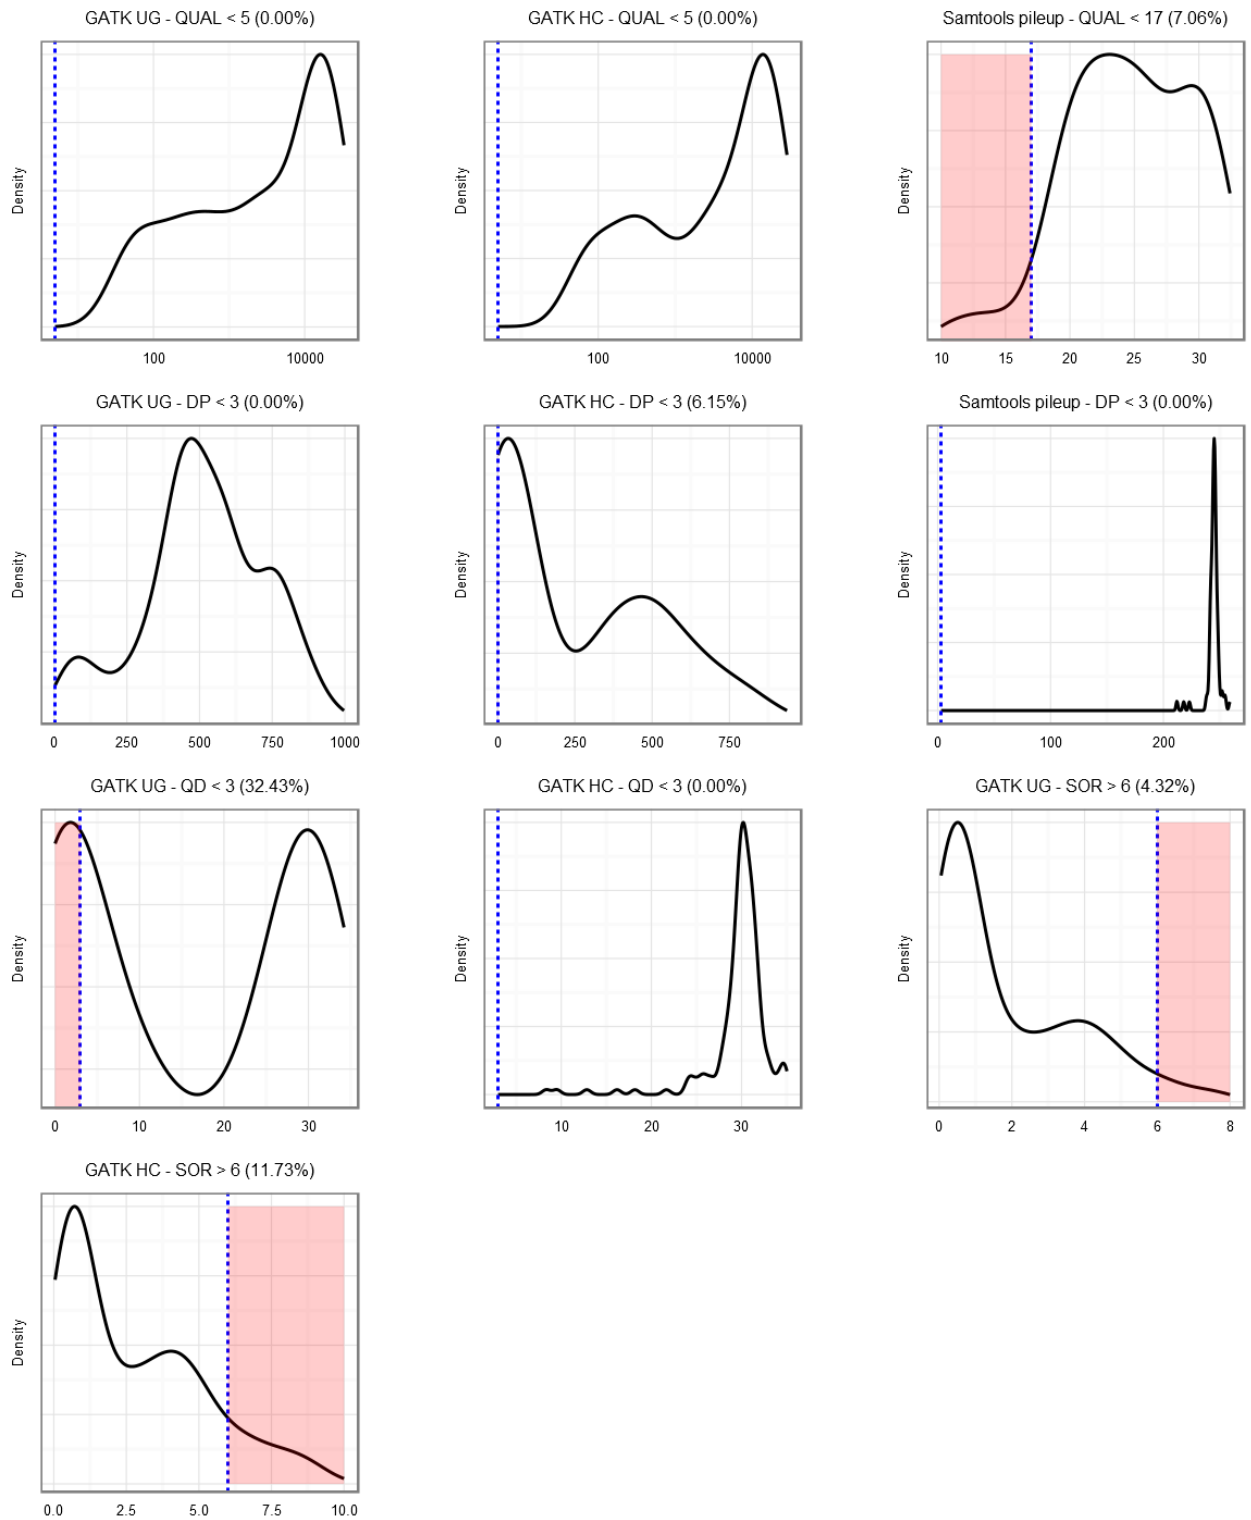

**Fig. S1.** Distribution of values of relevant technical parameters for predicted SNV aggregated across all samples. Optimized cut-off values used for variant filtering are shown with a blue dashed line. Predicted variants within the regions shaded in pink were discarded after filtering.
