# Supplementary material for: Genomic Variability among Field Isolates and Laboratory-Adapted Strains ofLeptospira borgpeterseniiSerovar Hardjo
Source: Hindawi journal article supplement (doi:10.1155/2018/2137036), 2018-01-01
Supplement: f3 [file 2137036.f3.pdf]

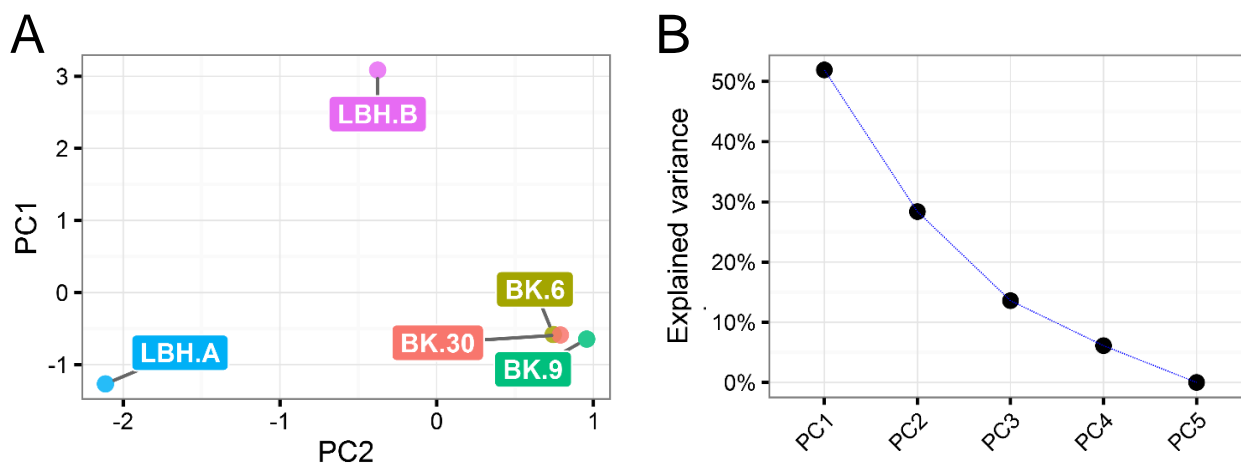

**Fig. S3.** Principal component analysis (PCA) conducted with moderate- and high-impact variants predicted within samples of each type. The analysis clearly separated field isolates and laboratory strains of the same type (A), with ~80% of the variability from each class explained by the first two principal components (B).
