# Supplementary material for: Genomic Variability among Field Isolates and Laboratory-Adapted Strains of Leptospira borgpetersenii Serovar Hardjo
Source: Int J Microbiol. 2018 May 22;2018:2137036. doi: 10.1155/2018/2137036 (PMC5987247; doi:10.1155/2018/2137036)
Supplement: Supplementary 4 — Table S1: cut-off values used for technical parameters in variant filtering (XLSX 10 KB). [file 2137036.f4.xlsx]

## Sheet: Table S1
Table S1. Cut-off values for technical parameters relevant in variant filtering.
Variant type	Parameter	GATK UG	% discarded	GATK HC	% discarded	Samtools	% discarded
SNPs	QUAL	< 5	0	< 5	0	< 17	0.0706
	DP	< 3	0	< 3	0.0615	< 3	0
	QD	< 2	0.3243	< 2	0	-	-
	SOR	> 6	0.0432	> 6	0.1173	-	-
Indels	QUAL	-	-	< 5	0	< 50	0.8462
	DP	-	-	< 3	0.0247	< 3	0
	QD	-	-	< 2	0	-	-
	SOR	-	-	> 10	0	-	-
QUAL: variant calling quality
DP: depth of coverage at the variant’s position
QD: Variant calling quality weighted by depth of coverage
SOR: strand odds ratio test
