# Supplementary material for: Genomic Variability among Field Isolates and Laboratory-Adapted Strains of Leptospira borgpetersenii Serovar Hardjo
Source: Int J Microbiol. 2018 May 22;2018:2137036. doi: 10.1155/2018/2137036 (PMC5987247; doi:10.1155/2018/2137036)
Supplement: Supplementary 5 — Table S2: summary of small variants detected between the sequenced specimens and their reference genomes (XLSX 11 KB). [file 2137036.f5.xlsx]

## Sheet: Table S2
Table S2. Summary of small variants detected between the sequenced specimens and their reference genomes.
Specimen	Reference	Non-coding regions		Coding sequences
		Intergenic	Pseudogenes	SNVs			Indels
				Silent	Missense	Nonsense	Inframe	Frameshifts
BK-6	L550	19	8	15 (8)	13 (3)	1 (1)	1 (0)	4 (1)
BK-9	L550	17	9	20 (13)	16 (8)	1 (1)	1 (0)	6 (3)
BK-30	L550	18	9	22 (14)	14 (7)	1 (1)	1 (0)	5 (1)
LBH-A	L550	17	11	21 (13)	21 (7)	0 (0)	2 (0)	6 (3)
LBH-B	JB197	11	10	18 (18)	21 (16)	3 (1)	2 (0)	5 (1)
NOTE: Values within parentheses indicate how many of the variants reported are associated to transposases or genes related to mobile elements.
