# Supplementary material for: Genomic Variability among Field Isolates and Laboratory-Adapted Strains of Leptospira borgpetersenii Serovar Hardjo
Source: Int J Microbiol. 2018 May 22;2018:2137036. doi: 10.1155/2018/2137036 (PMC5987247; doi:10.1155/2018/2137036)
Supplement: Supplementary 6 — Table S3: reference genes with at least one variant of moderate to high impact in the specimens sequenced in this study (XLSX 14 KB). [file 2137036.f6.xlsx]

## Sheet: Table S3
Table S3. Reference genes with at least one variant of moderate to high impact in the specimens sequenced in this study.
L550 ID	JB197 ID	BK-6	BK-9	BK-30	LBH-A	LBH-B_JB197	Product	Core genome	HARDJO group	LEPTO group	dN/dS LEPTO	Virulence hit
LBL_RS00365	LBJ_RS16545	c.76C>T / p.Pro26Ser	c.76C>T / p.Pro26Ser	c.76C>T / p.Pro26Ser	c.76C>T / p.Pro26Ser		ABC transporter substrate-binding protein	N	HARDJO_2713	LEPTO_2744	26.55
LBL_RS00745	LBJ_RS16105					c.971A>G / p.Tyr324Cys	hypothetical protein	N	HARDJO_3002	LEPTO_3042
LBL_RS01000	LBJ_RS15860			c.371G>A / p.Gly124Asp			argininosuccinate synthase	N	HARDJO_3001	LEPTO_3041
LBL_RS01330	LBJ_RS15585				c.545A>G / p.Asn182Ser		peptidase	Y	HARDJO_2609	LEPTO_2640
LBL_RS01610	LBJ_RS15300					c.729delA / p.Lys243fs	DNA-directed RNA polymerase sigma-70 factor	Y	HARDJO_2577	LEPTO_2608
LBL_RS01665	LBJ_RS15245				c.1649C>T / p.Pro550Leu, c.2276C>T / p.Ala759Val		Clp protease ATP-binding protein	Y	HARDJO_1018	LEPTO_1023		VFG0079 (gi:16802278) clpC - endopeptidase Clp ATP-binding chain C [Listeria monocytogenes (serovar 1/2a) EGD-e] (VF0072)
LBL_RS01820	LBJ_RS15090	c.107C>T / p.Thr36Ile					dienelactone hydrolase	Y	HARDJO_3470	LEPTO_3565
LBL_RS04135	LBJ_RS13030				c.3409G>A / p.Gly1137Ser		DNA-directed RNA polymerase subunit beta	Y	HARDJO_2428	LEPTO_2459	179.22	18839|vfid|42267|vsiid|63104|ssid|DNA-directed RNA polymerase subunit beta [Streptococcus agalactiae NEM316]
LBL_RS04140	LBJ_RS13025	c.1832T>C / p.Val611Ala	c.1832T>C / p.Val611Ala	c.1832T>C / p.Val611Ala	c.1832T>C / p.Val611Ala		DNA-directed RNA polymerase subunit beta'	Y	HARDJO_2427	LEPTO_2458	24.44	18840|vfid|42269|vsiid|63106|ssid|DNA-directed RNA polymerase subunit beta` [Streptococcus agalactiae NEM316]
LBL_RS04420	LBJ_RS12745					c.432_530delAGCGAGCACTACTCGTTTCGATTCAAGCGCCTTCGAAGATCCTCGTACAACTCCTTCAAGCTTAGCTATACTCGCCATTCCTCCGCAATATACGAGCGC / p.Glu144_Ala177delinsAsp	channel protein TolC	Y	HARDJO_2401	LEPTO_2432	27.42
LBL_RS05890	LBJ_RS10965		c.506_610dupACCCGGAACTTTACGGCCATAAGGCGCGTTGTGAAAATCATGATGAGAATTACGACGAAGGTTTTAAAGACGCCTTGAAAGCGGTAAATCTGGATAAAAAGAACG / p.Asp169_Asn203dup	c.506_610dupACCCGGAACTTTACGGCCATAAGGCGCGTTGTGAAAATCATGATGAGAATTACGACGAAGGTTTTAAAGACGCCTTGAAAGCGGTAAATCTGGATAAAAAGAACG / p.Asp169_Asn203dup			tetratricopeptide (TPR) repeat protein	N	HARDJO_3437	LEPTO_3532	15.53
LBL_RS06260	LBJ_RS05885				c.440C>T / p.Pro147Leu		nucleoside-diphosphate sugar epimerase	N	HARDJO_2895	LEPTO_2935
LBL_RS06310	LBJ_RS05835				c.1489_1491dupAGA / p.Arg497dup		flagellar M-ring protein FliF	Y	HARDJO_1788	LEPTO_1819		VFG1897 (gi:15791686) fliF - flagellar M-ring protein [Campylobacter jejuni NCTC 11168] (VF0114)
LBL_RS07300	LBJ_RS06910	c.1547A>G / p.Glu516Gly	c.1547A>G / p.Glu516Gly	c.1547A>G / p.Glu516Gly	c.1547A>G / p.Glu516Gly		histidine kinase	N	HARDJO_3414	LEPTO_3509
LBL_RS07835	LBJ_RS10330		c.1036G>A / p.Val346Met				helicase	Y	HARDJO_2179	LEPTO_2210
LBL_RS08205	LBJ_RS00965	c.429delG / p.Ile144fs	c.429delG / p.Ile144fs	c.429delG / p.Ile144fs	c.429delG / p.Ile144fs		chemotaxis protein CheD	Y	HARDJO_2143	LEPTO_2174		VFG2527 (gi:53720912) cheD - chemoreceptor glutamine deamidase CheD [Burkholderia pseudomallei K96243] (VF0430)
LBL_RS09705	LBJ_RS08350					c.610C>A / p.Leu204Ile	polysaccharide deacetylase	Y	HARDJO_3524	LEPTO_3651	21.86	VFG1040 (gi:15808720) shf - putative protein Shf [Shigella flexneri (serotype 2a) YSH6000]
LBL_RS10650	LBJ_RS09335				c.417_449delCATCGACGACGAAGCGCTTGTGGATGAGGAAAT / p.Ile139_Glu149del		hypothetical protein	N	HARDJO_3203	LEPTO_3253
LBL_RS11480	LBJ_RS05345					c.385G>T / p.Glu129*	transcriptional regulator	N	HARDJO_3400	LEPTO_3495
LBL_RS11755	LBJ_RS11675	c.231G>A / p.Met77Ile					2-oxoglutarate dehydrogenase E1	N	HARDJO_2306	LEPTO_2337
LBL_RS12010	LBJ_RS11945					c.291delA / p.Lys97fs	glucose kinase	Y	HARDJO_2336	LEPTO_2367		VFG1115 (gi:15641785) nanK - ROK family protein [Vibrio cholerae N16961]
LBL_RS12070	LBJ_RS12005	c.3388A>G / p.Thr1130Ala	c.3388A>G / p.Thr1130Ala	c.3388A>G / p.Thr1130Ala	c.3149T>C / p.Met1050Thr, c.3280C>T / p.Leu1094Phe, c.3388A>G / p.Thr1130Ala	c.4795G>A / p.Gly1599Arg	serine/threonine protein kinase	N	HARDJO_1005	LEPTO_1006	???
LBL_RS12915	LBJ_RS04210				c.317dupA / p.Asn106fs		hypothetical protein	Y	HARDJO_1641	LEPTO_1672
LBL_RS13195	LBJ_RS03930		c.1415A>G / p.His472Arg				hypothetical protein	Y	HARDJO_1619	LEPTO_1650
LBL_RS13335	LBJ_RS03790					c.531A>T / p.Leu177Phe	dimethyladenosine transferase	Y	HARDJO_1605	LEPTO_1636		23568|vfid|57149|vsiid|78016|ssid|S-adenosylmethionine-6-N`,N`-adenosyl rRNA dimethyltransferase [Photorhabdus luminescens subsp. laumondii TTO1]
LBL_RS13960	LBJ_RS03170				c.86C>T / p.Ala29Val		acyl-CoA dehydrogenase	Y	HARDJO_1570	LEPTO_1601
LBL_RS14110	LBJ_RS03020	c.134G>A / p.Gly45Glu					aspartokinase	Y	HARDJO_1559	LEPTO_1590
LBL_RS16765	LBJ_RS00335					c.1487_1522delGCGCGGTGATCGTTACGATTGTTTTTCTATTTCCTT / p.Ser496_Phe508delinsIle	serine phosphatase	Y	HARDJO_1013	LEPTO_1017
LBL_RS17660	LBJ_RS17295					c.353G>A / p.Trp118*	membrane protein	Y	HARDJO_3327	LEPTO_3378		17273|vfid|39135|vsiid|59972|ssid|TerC [Escherichia coli O157:H7 str. Sakai]
LBL_RS18205	LBJ_RS17855					c.2179A>G / p.Arg727Gly	histidine kinase	Y	HARDJO_1293	LEPTO_1324		VFG1888 (gi:52842130) letS - sensory box histidine kinase/response regulator [Legionella pneumophila Philadelphia 1] (VF0262)
		missense_variant
		stop_gained
		inframe_indel
		frameshift_variant

## Sheet: Table S3 (2)
LBL_RS00365	LBJ_RS16545	ABC transporter substrate-binding protein
LBL_RS00745	LBJ_RS16105	hypothetical protein
LBL_RS01000	LBJ_RS15860	argininosuccinate synthase
LBL_RS01330	LBJ_RS15585	peptidase	C
LBL_RS01610	LBJ_RS15300	DNA-directed RNA polymerase sigma-70 factor	C
LBL_RS01665	LBJ_RS15245	Clp protease ATP-binding protein	C	V
LBL_RS01820	LBJ_RS15090	dienelactone hydrolase	C
LBL_RS04135	LBJ_RS13030	DNA-directed RNA polymerase subunit beta	C	V
LBL_RS04140	LBJ_RS13025	DNA-directed RNA polymerase subunit beta'	C	V
LBL_RS04420	LBJ_RS12745	channel protein TolC	C
LBL_RS05890	LBJ_RS10965	tetratricopeptide (TPR) repeat protein
LBL_RS06260	LBJ_RS05885	nucleoside-diphosphate sugar epimerase
LBL_RS06310	LBJ_RS05835	flagellar M-ring protein FliF	C	V
LBL_RS07300	LBJ_RS06910	histidine kinase
LBL_RS07835	LBJ_RS10330	helicase	C
LBL_RS08205	LBJ_RS00965	chemotaxis protein CheD	C	V
LBL_RS09705	LBJ_RS08350	polysaccharide deacetylase	C	V
LBL_RS10650	LBJ_RS09335	hypothetical protein
LBL_RS11480	LBJ_RS05345	transcriptional regulator
LBL_RS11755	LBJ_RS11675	2-oxoglutarate dehydrogenase E1
LBL_RS12010	LBJ_RS11945	glucose kinase	C	V
LBL_RS12070	LBJ_RS12005	serine/threonine protein kinase
LBL_RS12915	LBJ_RS04210	hypothetical protein	C
LBL_RS13195	LBJ_RS03930	hypothetical protein	C
LBL_RS13335	LBJ_RS03790	dimethyladenosine transferase	C	V
LBL_RS13960	LBJ_RS03170	acyl-CoA dehydrogenase	C
LBL_RS14110	LBJ_RS03020	aspartokinase	C
LBL_RS16765	LBJ_RS00335	serine phosphatase	C
LBL_RS17660	LBJ_RS17295	membrane protein	C	V
LBL_RS18205	LBJ_RS17855	histidine kinase	C	V
