# Supplementary material for: Genomic Variability among Field Isolates and Laboratory-Adapted Strains of Leptospira borgpetersenii Serovar Hardjo
Source: Int J Microbiol. 2018 May 22;2018:2137036. doi: 10.1155/2018/2137036 (PMC5987247; doi:10.1155/2018/2137036)
Supplement: Supplementary 7 — Table S4: putative subtype-specific genes (XLSX 15 KB). [file 2137036.f7.xlsx]

## Sheet: Table S5
Table S4. Putative type-specific genes
GENE ID	PRODUCT	Core genome	Pathogenicity hit
Type B genes that has become pseudogenes in the type A genomes
LBJ_RS11430	ABC transporter ATP-binding protein	YES	VFG1206 (gi:15677997) fbpC - iron(III) ABC transporter, ATP-binding protein [Neisseria meningitidis MC58 (serogroup B)] (VF0272)
LBJ_RS01425	acyl-CoA dehydrogenase
LBJ_RS15085	ankyrin
LBJ_RS03670	ankyrin repeat protein
LBJ_RS02000	anti-sigma factor antagonist
LBJ_RS15840	flavoprotein	YES
LBJ_RS03360	galactokinase	YES
LBJ_RS09170	glycerate kinase
LBJ_RS17075	haloacid dehalogenase
LBJ_RS00510	histidine kinase	YES	VFG043346 (gi:52841990) fleS/flrB - flagellar sensor histidine kinase FleS [Legionella pneumophila subsp. pneumophila str. Philadelphia 1]
LBJ_RS13855	histidine kinase	YES	VFG0584 (gi:16767514) yjcC - putative diguanylate cyclase/phosphodiesterase [Salmonella enterica (serovar typhimurium) LT2]
LBJ_RS00400	hypothetical protein	YES
LBJ_RS04620	hypothetical protein
LBJ_RS05410	hypothetical protein
LBJ_RS06080	hypothetical protein	YES
LBJ_RS09020	hypothetical protein
LBJ_RS10040	hypothetical protein
LBJ_RS12780	hypothetical protein	YES
LBJ_RS15755	hypothetical protein
LBJ_RS11290	methylmalonyl-CoA mutase
LBJ_RS03315	transcriptional regulator
LBJ_RS00625	transposase
LBJ_RS01210	transposase
LBJ_RS01230	transposase
LBJ_RS03400	transposase
LBJ_RS04070	transposase
LBJ_RS04090	transposase
LBJ_RS04795	transposase
LBJ_RS04900	transposase
LBJ_RS05825	transposase
LBJ_RS07010	transposase
LBJ_RS07615	transposase
LBJ_RS07645	transposase
LBJ_RS07775	transposase
LBJ_RS08310	transposase
LBJ_RS09275	transposase
LBJ_RS09695	transposase
LBJ_RS09880	transposase
LBJ_RS11640	transposase
LBJ_RS12385	transposase
LBJ_RS13850	transposase
LBJ_RS14820	transposase
LBJ_RS16340	transposase
LBJ_RS16500	UDP-3-O-(3-hydroxymyristoyl) glucosamine N- acyltransferase		VFG011394 (gi:17987114) lpxD - UDP-3-O-[3-hydroxymyristoyl] glucosamine N-acyltransferase [LPS (CVF383)] [Brucella melitensis bv. 1 str. 16M]
Type A genes that has become pseudogenes in the type B genomes
LBL_RS15815	2-dehydropantoate 2-reductase
LBL_RS13930	3-ketoacyl-CoA thiolase
LBL_RS07175	ABC transporter ATP-binding protein		VFG044172 (gi:26250140) (chuV) ATP-binding hydrophilic protein ChuV [Chu (VF0227)] [Escherichia coli CFT073]
LBL_RS10150	adenylate cyclase
LBL_RS14550	adhesin
LBL_RS03845	AraC family transcriptional regulator
LBL_RS09835	cation transporter		VFG036992 (gi:15677562) (mtrD) multiple transferable resistance system protein MtrD [MtrCDE (VF0451)] [Neisseria meningitidis MC58]
LBL_RS04060	di-heme cytochrome C peroxidase	YES
LBL_RS04960	DNA-binding protein/transcriptional regulator
LBL_RS15495	DNA-directed RNA polymerase sigma-70 factor		VFG000121 (gi:15595959) algU - alginate biosynthesis protein AlgZ/FimS [Alginate (VF0091)] [Pseudomonas aeruginosa PAO1]
LBL_RS13610	endoflagellar protein
LBL_RS14690	glycosyl hydrolase family 2, sugar-binding domain protein
LBL_RS07180	HD family phosphohydrolase	YES
LBL_RS02170	histidine kinase		VFG009810 (gi:15607898) phoR - Possible two component system response sensor kinase membrane associated PhoR [Mycobacterium tuberculosis H37Rv]
LBL_RS03580	histidine kinase		VFG043346 (gi:52841990) fleS/flrB - flagellar sensor histidine kinase FleS [Legionella pneumophila subsp. pneumophila str. Philadelphia 1]
LBL_RS12025	histidine kinase
LBL_RS01270	hydrolase
LBL_RS03000	hypothetical protein
LBL_RS03245	hypothetical protein	YES
LBL_RS03810	hypothetical protein
LBL_RS04745	hypothetical protein
LBL_RS05220	hypothetical protein
LBL_RS05600	hypothetical protein
LBL_RS05720	hypothetical protein		VFG000075 (gi:16802477) inlA - Internalin A [Listeria monocytogenes EGD-e]
LBL_RS05740	hypothetical protein
LBL_RS06600	hypothetical protein
LBL_RS09680	hypothetical protein
LBL_RS11295	hypothetical protein
LBL_RS14585	hypothetical protein
LBL_RS15180	hypothetical protein	YES
LBL_RS15320	hypothetical protein
LBL_RS15505	hypothetical protein
LBL_RS15585	hypothetical protein
LBL_RS14070	peptide methionine sulfoxide reductase	YES
LBL_RS11610	phosphate acyltransferase	YES	VFG1226 (gi:15595606) pilH - twitching motility protein PilH [Pseudomonas aeruginosa PAO1] (VF0082)
LBL_RS10595	regulator (also a TCS, disrupted by a mobile element)		VFG000119 (gi:15600454) algR - alginate biosynthesis regulatory protein AlgR [Alginate (VF0091)] [Pseudomonas aeruginosa PAO1]
LBL_RS08285	secretion protein HlyD		VFG036974 (gi:15677563) mtrC - membrane fusion protein MtrC [MtrCDE (VF0451)] [Neisseria meningitidis MC58]
LBL_RS13565	single-stranded DNA-binding protein	YES	VFG0576 (gi:16767506) ssb - ssDNA-binding protein controls activity of RecBCD nuclease [Salmonella enterica (serovar typhimurium) LT2]
LBL_RS15335	tetratricopeptide repeat protein
LBL_RS00250	transposase
LBL_RS03315	transposase
LBL_RS06515	transposase
LBL_RS06760	transposase
LBL_RS08085	transposase
LBL_RS10105	transposase
LBL_RS10515	transposase
LBL_RS12400	transposase
LBL_RS01810	Zn-dependent hydrolase
