# Supplementary material for: Genomic Variability among Field Isolates and Laboratory-Adapted Strains of Leptospira borgpetersenii Serovar Hardjo
Source: Int J Microbiol. 2018 May 22;2018:2137036. doi: 10.1155/2018/2137036 (PMC5987247; doi:10.1155/2018/2137036)
Supplement: Supplementary 8 — Table S5: summary of small variants detected for subtype A genes when using the subtype B genome as reference (XLSX 10 KB). [file 2137036.f8.xlsx]

## Sheet: Table S6
Table S5. Summary of small variants detected for type A genes when using the type B genome as reference.
Specimen	Non-coding regions		Coding sequences
	Intergenic	Pseudogenes	SNVs			Indels
			Silent	Missense	Nonsense	Inframe	Frameshifts
BK-6	1337	625	1357	1288	25	38	81
BK-9	1319	607	1296	1246	24	40	86
BK-30	1326	640	1387	1298	24	40	81
LBH-A	1324	634	1372	1305	24	43	76
