# Supplementary material for: Genomic Variability among Field Isolates and Laboratory-Adapted Strains of Leptospira borgpetersenii Serovar Hardjo
Source: Int J Microbiol. 2018 May 22;2018:2137036. doi: 10.1155/2018/2137036 (PMC5987247; doi:10.1155/2018/2137036)
Supplement: Supplementary 10 — Table S7: Gene Ontology (GO) terms found to be enriched in the genes from strain JB197 whose orthologs in our subtype A specimens have high-impact mutations (XLSX 15 KB). [file 2137036.f10.xlsx]

## Sheet: Table S8
Table S7. Gene Ontology (GO) terms found to be enriched in the genes from strain JB197 whose orthologs in our type A specimens have high impact mutations.
GO ID	Term	Category	Test %	Ref %	P-Value	Test Seqs
GO:0016021	integral component of membrane	C	30.4348	22.0416	0.0384108	LBJ_RS03305, LBJ_RS15490, LBJ_RS00315, LBJ_RS15370, LBJ_RS00955, LBJ_RS16065, LBJ_RS17430, LBJ_RS08435, LBJ_RS08675, LBJ_RS08715, LBJ_RS09645, LBJ_RS04510, LBJ_RS03940, LBJ_RS07470, LBJ_RS12650, LBJ_RS08960, LBJ_RS13340, LBJ_RS16575, LBJ_RS09090, LBJ_RS01415, LBJ_RS16195, LBJ_RS15260, LBJ_RS17680, LBJ_RS16230, LBJ_RS16990, LBJ_RS08205, LBJ_RS05695, LBJ_RS03795, LBJ_RS06820, LBJ_RS09300, LBJ_RS050…
GO:0000166	nucleotide binding	F	13.0435	8.34086	0.0304609	LBJ_RS03305, LBJ_RS01920, LBJ_RS08915, LBJ_RS11805, LBJ_RS05245, LBJ_RS05320, LBJ_RS02650, LBJ_RS07945, LBJ_RS09765, LBJ_RS03940, LBJ_RS06380, LBJ_RS05450, LBJ_RS11680, LBJ_RS02580, LBJ_RS02140, LBJ_RS08045, LBJ_RS13185, LBJ_RS15400, LBJ_RS07190, LBJ_RS17120, LBJ_RS00040, LBJ_RS02220, LBJ_RS07955, LBJ_RS04325, LBJ_RS15415, LBJ_RS15615, LBJ_RS11890, LBJ_RS02195, LBJ_RS03680, LBJ_RS05185, LBJ_RS152…
GO:0046872	metal ion binding	F	10.766	4.93827	0.000142811	LBJ_RS03305, LBJ_RS03505, LBJ_RS15370, LBJ_RS04155, LBJ_RS05320, LBJ_RS01120, LBJ_RS09765, LBJ_RS03300, LBJ_RS03940, LBJ_RS07270, LBJ_RS13780, LBJ_RS13185, LBJ_RS11360, LBJ_RS15400, LBJ_RS17105, LBJ_RS17305, LBJ_RS01775, LBJ_RS17285, LBJ_RS17120, LBJ_RS17485, LBJ_RS00040, LBJ_RS01250, LBJ_RS05695, LBJ_RS00760, LBJ_RS04645, LBJ_RS07955, LBJ_RS04325, LBJ_RS14405, LBJ_RS05065, LBJ_RS13155, LBJ_RS173…
GO:0006508	proteolysis	P	4.14079	1.98735	0.0251674	LBJ_RS16390, LBJ_RS17140, LBJ_RS17230, LBJ_RS14470, LBJ_RS04155, LBJ_RS07720, LBJ_RS07465, LBJ_RS07740, LBJ_RS02220, LBJ_RS02530, LBJ_RS14755, LBJ_RS07470, LBJ_RS09675, LBJ_RS12650, LBJ_RS05065, LBJ_RS13155, LBJ_RS02580, LBJ_RS11700, LBJ_RS12975, LBJ_RS16105
GO:0070011	peptidase activity, acting on L-amino acid peptides	F	3.10559	1.23457	0.0145218	LBJ_RS16390, LBJ_RS17140, LBJ_RS17230, LBJ_RS14470, LBJ_RS04155, LBJ_RS07465, LBJ_RS14755, LBJ_RS09675, LBJ_RS12650, LBJ_RS05065, LBJ_RS13155, LBJ_RS02580, LBJ_RS11700, LBJ_RS12975, LBJ_RS16105
GO:0000160	phosphorelay signal transduction system	P	3.10559	1.29479	0.0200145	LBJ_RS03890, LBJ_RS07565, LBJ_RS05145, LBJ_RS09940, LBJ_RS07945, LBJ_RS07955, LBJ_RS00650, LBJ_RS05555, LBJ_RS15415, LBJ_RS08570, LBJ_RS04280, LBJ_RS11265, LBJ_RS04285, LBJ_RS16995, LBJ_RS17855
GO:0000155	phosphorelay sensor kinase activity	F	1.86335	0.572117	0.0168759	LBJ_RS15415, LBJ_RS04280, LBJ_RS07565, LBJ_RS05145, LBJ_RS07945, LBJ_RS07955, LBJ_RS00650, LBJ_RS05555, LBJ_RS17855
GO:0023014	signal transduction by protein phosphorylation	P	1.86335	0.572117	0.0168759	LBJ_RS15415, LBJ_RS04280, LBJ_RS07565, LBJ_RS05145, LBJ_RS07945, LBJ_RS07955, LBJ_RS00650, LBJ_RS05555, LBJ_RS17855
GO:0016831	carboxy-lyase activity	F	1.44928	0.240891	0.00344688	LBJ_RS02180, LBJ_RS08960, LBJ_RS16690, LBJ_RS01825, LBJ_RS05320, LBJ_RS17810, LBJ_RS17625
GO:0008170	N-methyltransferase activity	F	1.24224	0.120446	0.00132909	LBJ_RS02070, LBJ_RS00725, LBJ_RS03790, LBJ_RS02680, LBJ_RS10830, LBJ_RS01675
GO:0006778	porphyrin-containing compound metabolic process	P	1.0352	0.271003	0.0458466	LBJ_RS15605, LBJ_RS16690, LBJ_RS17485, LBJ_RS16710, LBJ_RS16665
GO:0008408	3'-5' exonuclease activity	F	0.828157	0.0903342	0.0118797	LBJ_RS05265, LBJ_RS16455, LBJ_RS15310, LBJ_RS14145
GO:0019439	aromatic compound catabolic process	P	0.828157	0.120446	0.0209876	LBJ_RS11595, LBJ_RS17485, LBJ_RS05265, LBJ_RS15810
GO:0044270	cellular nitrogen compound catabolic process	P	0.828157	0.120446	0.0209876	LBJ_RS11595, LBJ_RS17485, LBJ_RS05265, LBJ_RS15810
GO:0046700	heterocycle catabolic process	P	0.828157	0.120446	0.0209876	LBJ_RS11595, LBJ_RS17485, LBJ_RS05265, LBJ_RS15810
GO:1901136	carbohydrate derivative catabolic process	P	0.828157	0.150557	0.0333964	LBJ_RS02195, LBJ_RS13130, LBJ_RS13805, LBJ_RS04585
GO:1901361	organic cyclic compound catabolic process	P	0.828157	0.120446	0.0209876	LBJ_RS11595, LBJ_RS17485, LBJ_RS05265, LBJ_RS15810
GO:0009435	NAD biosynthetic process	P	0.621118	0.0903342	0.0468453	LBJ_RS01775, LBJ_RS11550, LBJ_RS04670
GO:0004427	inorganic diphosphatase activity	F	0.414079	0	0.0223465	LBJ_RS05390, LBJ_RS01250
GO:0004450	isocitrate dehydrogenase (NADP+) activity	F	0.414079	0	0.0223465	LBJ_RS01150, LBJ_RS15400
GO:0016896	exoribonuclease activity, producing 5'-phosphomonoesters	F	0.414079	0	0.0223465	LBJ_RS05265, LBJ_RS16455
GO:0090503	RNA phosphodiester bond hydrolysis, exonucleolytic	P	0.414079	0	0.0223465	LBJ_RS05265, LBJ_RS16455
