# Supplementary material for: Genomic Variability among Field Isolates and Laboratory-Adapted Strains of Leptospira borgpetersenii Serovar Hardjo
Source: Int J Microbiol. 2018 May 22;2018:2137036. doi: 10.1155/2018/2137036 (PMC5987247; doi:10.1155/2018/2137036)
Supplement: Supplementary 12 — Table S9: P2PR predictions of transcriptional regulators in the genomes of L. borgpetersenii strains L550 and JB197 (XLSX 15 KB). [file 2137036.f12.xlsx]

## Sheet: Table S10
Table S9. P2PR predictions of transcriptional regulators in the genomes of L. borgpetersenii strains L550 and JB197.
L550	JB197	Class	Type	P2RP description
LBL_RS00185	LBJ_RS00555	TR	TetR	Transcription factor, TetR family contains 1 TetR_N
LBL_RS00595	LBJ_RS16265	TR	MarR	Transcription factor, MarR family contains 1 MarR
LBL_RS00630	LBJ_RS16230	TR	AraC	Transcription factor, AraC family contains 1 HTH_AraC
LBL_RS00785	LBJ_RS16070	TR	AraC	Transcription factor, AraC family contains 2 HTH_AraC
LBL_RS01050	-	TR	MarR	Transcription factor, MarR family contains 1 MarR
LBL_RS01145	LBJ_RS15765	SF	Ecf	Sigma factor, Ecf family contains 1 Sigma70_r2,1 Sigma70_r4
LBL_RS01610	LBJ_RS15300	SF	Unclassified	Sigma factor, Unclassified contains 1 Sigma70_r2
LBL_RS01895	LBJ_RS15015	TR	ArsR	Transcription factor, ArsR family contains 1 HTH_5
LBL_RS03065	LBJ_RS14100	TR	TetR	Transcription factor, TetR family contains 1 TetR_N
LBL_RS03235	LBJ_RS13930	TR	PadR	Transcription factor, PadR family contains 1 PadR
LBL_RS03845	-	TR	AraC	Transcription factor, AraC family contains 1 HTH_AraC
LBL_RS03855	LBJ_RS13300	TR	Xre	Transcription factor, Xre family contains 1 HTH_3
LBL_RS03865	LBJ_RS13290	TR	Xre	Transcription factor, Xre family contains 1 HTH_XRE
LBL_RS04370	LBJ_RS12800	TR	TetR	Transcription factor, TetR family contains 1 TetR_N
LBL_RS04960	-	TR	Xre	Transcription factor, Xre family contains 1 HTH_3
LBL_RS05065	LBJ_RS04975	SF	Ecf	Sigma factor, Ecf family contains 1 Sigma70_r2,1 Sigma70_r4
LBL_RS05545	LBJ_RS11300	TR	Xre	Transcription factor, Xre family contains 1 HTH_XRE
LBL_RS05655	LBJ_RS11195	TR	Xre	Transcription factor, Xre family contains 1 HTH_XRE
LBL_RS05680	LBJ_RS11170	TR	Fur	Transcription factor, Fur family contains 1 FUR
LBL_RS06035	LBJ_RS10860	OCS	LexA	Transcription factor, LexA family contains 1 LexA_DNA_bind,1 Peptidase_S24
LBL_RS06115	LBJ_RS09830	TR	Xre	Transcription factor, Xre family contains 1 HTH_XRE
LBL_RS06120	LBJ_RS09825	TR	Xre	Transcription factor, Xre family contains 1 HTH_3
LBL_RS06125	LBJ_RS09820	TR	Xre	Transcription factor, Xre family contains 1 HTH_3
LBL_RS06570	LBJ_RS06155	TR	MarR	Transcription factor, MarR family contains 1 MarR
LBL_RS07080	LBJ_RS06685	TR	Xre	Transcription factor, Xre family contains 1 HTH_XRE
LBL_RS07265	LBJ_RS06875	TR	MarR	Transcription factor, MarR family contains 1 MarR
LBL_RS07325	LBJ_RS09915	TR	Xre	Transcription factor, Xre family contains 2 HTH_XRE
LBL_RS07415	LBJ_RS10750	RR	OmpR	Response regulator, OmpR family contains 1 Response_reg,1 Trans_reg_C
LBL_RS07710	LBJ_RS10455	SF	Ecf	Sigma factor, Ecf family contains 1 Sigma70_r2,1 Sigma70_r4
LBL_RS08530	LBJ_RS07195	TR	ArsR	Transcription factor, ArsR family contains 1 HTH_5
LBL_RS08950	LBJ_RS07605	SF		Sigma factor, RpoE family contains 1 Sigma70_r1_1,1 Sigma70_r1_2,1 Sigma70_r2,1 Sigma70_r3,1 Sigma70_r4
LBL_RS09030	LBJ_RS07685	TR	TetR	Transcription factor, TetR family contains 1 TetR_N
LBL_RS09285	LBJ_RS07940	RR	NtrC	Response regulator, NtrC family contains 1 Response_reg,1 AAA,1 HTH_8
LBL_RS09305	LBJ_RS07960	SF	RpoN	Sigma factor, RpoN family contains 1 Sigma54_AID,1 Sigma54_CBD,1 Sigma54_DBD
LBL_RS09830	LBJ_RS08475	TR	Xre	Transcription factor, Xre family contains 1 HTH_3
LBL_RS10095	LBJ_RS08790	TR	Fur	Transcription factor, Fur family contains 1 FUR
LBL_RS10205	LBJ_RS08900	SF		Sigma factor, RpoE family contains 1 Sigma70_r2,1 Sigma70_r3,1 Sigma70_r4
LBL_RS10765	LBJ_RS09450	TR	Rrf2	Transcription factor, Rrf2 family contains 1 Rrf2
LBL_RS10780	LBJ_RS09465	TR	Unclassified	Transcription factor, Unclassified contains 1 Pencillinase_R
LBL_RS11000	LBJ_RS09685	TR	TetR	Transcription factor, TetR family contains 1 TetR_N
LBL_RS11125	LBJ_RS05700	TR	TetR	Transcription factor, TetR family contains 1 TetR_N
LBL_RS11345	LBJ_RS05480	TR	LexA	Transcription factor, LexA family contains 1 LexA_DNA_bind
LBL_RS11480	LBJ_RS05345	TR	Xre	Transcription factor, Xre family contains 1 HTH_XRE
LBL_RS11940	LBJ_RS11875	TR	Xre	Transcription factor, Xre family contains 1 HTH_XRE
LBL_RS12425	LBJ_RS04705	TR	ArsR	Transcription factor, ArsR family contains 1 HTH_5
LBL_RS12485	LBJ_RS04645	TR	Fur	Transcription factor, Fur family contains 1 FUR
LBL_RS12840	LBJ_RS04285	RR	NarL	Response regulator, NarL family contains 1 Response_reg,1 HTH_LUXR
LBL_RS13270	LBJ_RS03855	TR	ArsR	Transcription factor, ArsR family contains 1 HTH_5
LBL_RS13550	LBJ_RS03575	SF	Ecf	Sigma factor, Ecf family contains 1 Sigma70_r2,1 Sigma70_r4
LBL_RS13680	LBJ_RS03445	TR	Xre	Transcription factor, Xre family contains 1 HTH_XRE
LBL_RS13805	LBJ_RS03320	OCS	LuxR	Transcription factor, LuxR family contains 1 PAS,1 HTH_LUXR
LBL_RS13835	LBJ_RS03295	TR	CsoR	Transcription factor, CsoR family contains 1 DUF156
LBL_RS14060	LBJ_RS03070	TR	TetR	Transcription factor, TetR family contains 1 TetR_N
LBL_RS14245	LBJ_RS02880	SF	Ecf	Sigma factor, Ecf family contains 1 Sigma70_r2,1 Sigma70_r4
LBL_RS14355	LBJ_RS02770	TR	MarR	Transcription factor, MarR family contains 1 MarR
LBL_RS14730	LBJ_RS02385	TR	HrcA	Transcription factor, HrcA family contains 1 HrcA
LBL_RS14895	LBJ_RS02225	TR	AbrB	Transcription factor, AbrB family contains 1 SpoVT_AbrB
LBL_RS14955	LBJ_RS02165	TR	Xre	Transcription factor, Xre family contains 1 HTH_XRE
LBL_RS15170	LBJ_RS01950	RR	NarL	Response regulator, NarL family contains 1 Response_reg,1 GerE
LBL_RS15495	-	SF	Ecf	Sigma factor, Ecf family contains 1 Sigma70_r2,1 Sigma70_r4
LBL_RS15545	LBJ_RS01575	TR	MarR	Transcription factor, MarR family contains 1 MarR
LBL_RS15620	LBJ_RS01500	TR	TetR	Transcription factor, TetR family contains 1 TetR_N
LBL_RS15705	LBJ_RS01445	TR	ArsR	Transcription factor, ArsR family contains 1 HTH_5
LBL_RS15740	LBJ_RS01410	TR	TetR	Transcription factor, TetR family contains 1 TetR_N
LBL_RS16100	LBJ_RS01045	SF	Ecf	Sigma factor, Ecf family contains 1 Sigma70_r2,1 Sigma70_r4
LBL_RS16115	LBJ_RS01030	RR	OmpR	Response regulator, OmpR family contains 1 Response_reg,1 Trans_reg_C
LBL_RS16195	LBJ_RS00950	SF	Unclassified	Sigma factor, Unclassified contains 1 Sigma70_r2,1 HTH_LUXR
LBL_RS16275	LBJ_RS00870	TR	Xre	Transcription factor, Xre family contains 1 HTH_XRE
LBL_RS16590	LBJ_RS00160	TR	AbrB	Transcription factor, AbrB family contains 1 SpoVT_AbrB
LBL_RS16600	LBJ_RS00170	TR	KorB	Transcription factor, KorB family contains 1 KorB
LBL_RS16695	LBJ_RS00265	SF	Unclassified	Sigma factor, Unclassified contains 1 Sigma70_r2
LBL_RS16970	LBJ_RS16685	RR	OmpR	Response regulator, OmpR family contains 1 Response_reg,1 Trans_reg_C
LBL_RS17295	-	TR	TetR	Transcription factor, TetR family contains 1 TetR_N
LBL_RS17300	-	TR	AraC	Transcription factor, AraC family contains 1 HTH_AraC
LBL_RS17315	-	TR	AraC	Transcription factor, AraC family contains 1 HTH_AraC
LBL_RS17455	LBJ_RS17090	TR	ArsR	Transcription factor, ArsR family contains 1 HTH_5,1 FtsJ
LBL_RS18045	LBJ_RS17690	SF	Ecf	Sigma factor, Ecf family contains 1 Sigma70_r2,1 Sigma70_r4
LBL_RS18215	LBJ_RS17865	TR	TetR	Transcription factor, TetR family contains 1 TetR_N
LBL_RS18245	LBJ_RS17895	RR	OmpR	Response regulator, OmpR family contains 1 Response_reg,1 Trans_reg_C
TR	Transcriptional regulators (single DNA-binding domain)
SF	Sigma factor
RR	Response regulators
OCS	One-componen system
