# Supplementary material for: Genomic Variability among Field Isolates and Laboratory-Adapted Strains of Leptospira borgpetersenii Serovar Hardjo
Source: Int J Microbiol. 2018 May 22;2018:2137036. doi: 10.1155/2018/2137036 (PMC5987247; doi:10.1155/2018/2137036)
Supplement: Supplementary 13 — Table S10: structural variants (duplications/deletions) larger than 2 kb predicted by CNVnator in the genomes of the three subtype A field isolates (XLSX 12 KB). [file 2137036.f13.xlsx]

## Sheet: Table S4
Table S10. Structural variants (duplications/deletions) larger than 2 kb predicted by CNVnator in the genomes of the three type A field isolates.
Isolate	Type	Chromosome	Start	End	Size (bp)	Ref genes affected	Read depth	P-value
BK-6	duplication	Chr I	21031	24390	3360	LBL_RS00090-LBL_RS00095 (2)*	1.67298	0
BK-6	duplication	Chr I	61561	65430	3870	LBL_RS00265-LBL_RS00280 (4)*	1.61372	0
BK-6	duplication	Chr I	126421	130710	4290	LBL_RS00620-LBL_RS00635 (4)*	1.57321	0
BK-6	duplication	Chr I	273061	275220	2160	LBL_RS01280-LBL_RS01285 (2)	1.58831	0
BK-6	duplication	Chr I	299581	302220	2640	LBL_RS01405-LBL_RS01410 (2)	1.50194	0
BK-6	deletion	Chr I	506101	535950	29850	LBL_RS02460-LBL_RS02635 (42)*	0.456753	5.33911e-12
BK-6	duplication	Chr I	1458631	1460700	2070	LBL_RS06960-LBL_RS06965 (2)	1.52253	0
BK-6	duplication	Chr I	1513381	1518150	4770	LBL_RS07230-LBL_RS07260 (7)	1.51429	0
BK-6	duplication	Chr I	1665811	1674330	8519	LBL_RS07990-LBL_RS08010 (5)*	1.62986	0
BK-6	duplication	Chr I	2088181	2102910	14730	LBL_RS09965-LBL_RS10030 (14)	3.24832	0
BK-6	duplication	Chr I	3366421	3369180	2760	LBL_RS15760 (1)	1.55465	0
BK-6	duplication	Chr I	3395881	3399150	3270	LBL_RS15880-LBL_RS15885 (2)	1.64969	0
BK-6	duplication	Chr I	3404071	3406200	2130	LBL_RS15910-LBL_RS15915 (2)	1.61445	5.77632e-08
BK-6	duplication	Chr I	3589381	3591390	2010	LBL_RS16765 (1)	1.6311	0
BK-9	duplication	Chr I	21061	24450	3390	LBL_RS00090-LBL_RS00095 (2)*	1.50787	0
BK-9	duplication	Chr I	272761	275340	2580	LBL_RS01280-LBL_RS01285 (2)	1.53891	0
BK-9	deletion	Chr I	506002	533910	27908	LBL_RS02460-LBL_RS02645 (44)*	0.478454	2.86693e-12
BK-9	duplication	Chr I	3012151	3014850	2700	LBL_RS14125-LBL_RS14130 (2)	1.60129	0
BK-9	duplication	Chr I	3466831	3470100	3270	LBL_RS16220-LBL_RS16230 (3)	1.53543	0
BK-9	duplication	Chr I	3478921	3481410	2489	LBL_RS16280-LBL_RS16290 (3)	1.50641	0.0007
BK-30	deletion	Chr I	506801	533820	27019	LBL_RS02450-LBL_RS02640 (41)*	0.487429	6.14863e-12
BK-30	duplication	Chr I	2088181	2185470	97290	LBL_RS09960-LBL_RS10405 (84)*	1.77212	0
BK-30	duplication	Chr I	3012511	3014850	2340	LBL_RS14125-LBL_RS14130 (2)	1.72527	0
* Region includes or is flanked by at least one gene encoding a transposase or mobile element protein.
